# Supplementary material
Source: publisher site journal article supplement (https://www.dovepress.com/article/576598)
Supplement: Supplementary file 1 [file 576598_Supplementary%20Material%20%25288%2529.docx]

| **Table S1. The parameter values and parameter estimate variances of final model and Bootstrap** | | | | | | | |
| --- | --- | --- | --- | --- | --- | --- | --- |
| **Parameters** | **Base model** | | **Final model** | | **Bootstrap** | | **Bias (%)** |
| **Estimate** | **RSE (%)** | **Estimate** | **RSE (%)** | **Median** | **95%CI** |
| θCL/F (L/h) | 17.3 | 3.9 | 20.9 | 4.8 | 20.73 | (18.58, 23.01) | -0.81 |
| V/F (L) | 515 | 15.5 | 519 | 14.1 | 522.32 | (351.0,671.5) | 0.64 |
| Ka (h-1) | 4.5(fixed) | — | 4.5(fixed) | — | 4.5(fixed) | — | — |
| θWuzhi | — | — | 0.731 | 7.5 | 0.760 | (0.69, 0.85) | 3.97 |
| θCYP3A5 | — | — | 0.768 | 5.2 | 0.770 | (0.69, 0.86) | 0.26 |
| ωCL/F | 0.302 | 16.6 | 0.285 | 17.1 | 0.282 | (0.23, 0.33) | -1.05 |
| σprop err(%) | 21.6 | 11.8 | 20.4 | 10.9 | 20.372 | (18.16, 22.65) | -0.14 |
| Bias% = (Bootstrap−NONMEM) / NONMEM × 100%  Abbreviations: RSE, relative standard error; Cl, confidence interval; CL/F, apparent clearance; V/F, apparent volume of distribution; Ka, oral absorption rate;Wuzhi, wuzhi capsule; ω, inter-individual variability; σprop err, proportional error. | | | | | | | |

| **Table S2. Performance of ML algorithms under RFECV(CV=5)** | | | | | | | | | |
| --- | --- | --- | --- | --- | --- | --- | --- | --- | --- |
| **Model** | **CatBoost** | **RF** | **LightGBM** | **XGBoost** | **GraBoost** | **AdaBoost** | **SVR** | **MLP** | **KNN** |
| aR2 | 0.475 | 0.622 | 0.449 | 0.465 | 0.568 | 0.495 | 0.420 | 0.444 | 0.425 |
| bR2 | 0.542 | 0.566 | 0.443 | 0.488 | 0.534 | 0.463 | 0.432 | 0.322 | 0.352 |
| a with PK parameters.  b without PK parameters.  Abbreviations: ML, machine learning; RFECV, Recursive Feature Elimination with Cross-Validation; CatBoost, categorical boosting; RF, random forest; LightGBM, light gradient boosting machine; GraBoost, gradient boosting; AdaBoost, adaptive boosting; XGBoost, eXtreme Gradient BoostingX; SVR, support vector regression; MLP, multilayer perceptron; KNN, K-Nearest Neighbors. | | | | | | | | | |

| **Table S3. VIF tests for features under two scenarios** | | | | | | |
| --- | --- | --- | --- | --- | --- | --- |
| **with PK parameters** | | |  | **without PK parameters** | | |
| **Variables** | **VIF** | |  | **Variables** | **VIF** | |
| **Pre-calibration** | **post-calibration** | **Pre-calibration** | **post-calibration** |
| Total daily dose, mg | 1.437 | 1.397 |  | Total daily dose, mg | 1.384 | 1.358 |
| CL/F, L/h | 4.797 | 1.327 |  | CYP3A5 | 1.383 | 1.330 |
| CYP3A5 | 4.853 | — |  | ALB, g/L | 1.617 | 1.616 |
| ALB, g/L | 1.585 | 1.582 |  | Dosing time, day | 1.124 | 1.121 |
| Dosing time, day | 1.157 | 1.114 |  | NE#, 109/L | 1.078 | 1.078 |
| NE#, 109/L | 1.094 | 1.078 |  | BUN, mmol/L | 1.445 | 1.439 |
| BUN, mmol/L | 1.447 | 1.438 |  | CCR, ml/min | 1.636 | 1.635 |
| CCR, ml/min | 1.636 | 1.631 |  | TBIL, μmol/L | 1.366 | 1.365 |
| IBIL, μmol/L | 1.389 | 1.371 |  | IBIL, μmol/L | 1.600 | 1.594 |
| BMI | 4.939 | 1.368 |  | BMI | 4.913 | 1.409 |
| Weight, kg | 4.945 | — |  | Weight, kg | 4.895 | — |
| Abbreviations: VIF, Variance Inflation Factor; ALB, albumin; NE#, neutrophils; BUN, blood urea nitrogen; CCR, creatinine clearance rate; IBIL, indirect bilirubin; TBIL, total bilirubin; CL/F, apparent clearance. | | | | | | |

| **Table S4. Performance of the TAC plasma concentration prediction model in the training cohort** | | | | | | | | |
| --- | --- | --- | --- | --- | --- | --- | --- | --- |
| **Model** | **aR2** | **bR2** | **aMAE** | **bMAE** | **aMSE** | **bMSE** | **aRMSE** | **bRMSE** |
| CatBoost | 0.882 | 0.898 | 0.651 | 0.598 | 0.636 | 0.548 | 0.798 | 0.741 |
| RF | 0.867 | 0.836 | 0.641 | 0.732 | 0.719 | 0.883 | 0.848 | 0.939 |
| LightGBM | 0.814 | 0.779 | 0.773 | 0.835 | 1.005 | 1.191 | 1.002 | 1.091 |
| XGBoost | 0.949 | 0.933 | 0.398 | 0.462 | 0.271 | 0.359 | 0.521 | 0.599 |
| GraBoost | 0.901 | 0.984 | 0.550 | 0.055 | 0.533 | 0.086 | 0.730 | 0.294 |
| AdaBoost | 0.886 | 0.912 | 0.634 | 0.544 | 0.616 | 0.475 | 0.785 | 0.688 |
| SVR | 0.498 | 0.443 | 1.245 | 1.370 | 2.707 | 3.006 | 1.645 | 1.734 |
| MLP | 0.894 | 0.852 | 0.595 | 0.692 | 0.569 | 0.797 | 0.755 | 0.893 |
| KNN | 0.921 | 0.876 | 0.451 | 0.527 | 0.652 | 0.789 | 0.842 | 0.887 |
| ensemble model | 0.894 | 0.932 | 0.619 | 0.504 | 0.573 | 0.368 | 0.757 | 0.607 |
| a with PK parameters.  b without PK parameters.  Abbreviations: TAC, tacrolimus; MAE, mean absolute error; MSE, mean square error; RMSE, root mean square error; CatBoost, categorical boosting; RF, random forest; LightGBM, light gradient boosting machine; GraBoost, gradient boosting; AdaBoost, adaptive boosting; XGBoost, eXtreme Gradient BoostingX; SVR, support vector regression; MLP, multilayer perceptron; KNN, K-Nearest Neighbors. | | | | | | | | |

| **Table S5. Statistical comparison of mean absolute SHAP values between CL/F and conventional biochemical indicators** | | | |
| --- | --- | --- | --- |
| **Compared feature** | **Mean difference (CL/F − feature)** | **95% CI** | **p value** |
| BUN | 0981 | 0.915-1.046 | 1.264×e-48 |
| ALB | 0.983 | 0.923-1.043 | 1.151×e-48 |
| BMI | 1.017 | 0.958-1.079 | 8.405×e-49 |
| IBIL | 1.083 | 1.025-1.145 | 8.144×e-49 |
| NE# | 1.069 | 1.012-1.129 | 8.144×e-49 |
| CCR | 1.084 | 1.027-1.142 | 8.144×e-49 |
| Abbreviations: ALB, albumin; NE#, neutrophils; BUN, blood urea nitrogen; CCR, creatinine clearance rate; IBIL, indirect bilirubin; CL/F, apparent clearance. | | | |
